# Supplementary material for: Formulation of a fast-disintegrating drug delivery system from cyclodextrin/naproxen inclusion complex nanofibrous films
Source: Royal Society of Chemistry journal article supplement (doi:10.1039/d3md00557g), 2023-12-21
Supplement: d3md00557g1.pdf [file d3md00557g1.pdf]

## SUPPORTING INFORMATION

### **Formulation of Fast-Disintegrating Drug Delivery System from Cyclodextrin/Naproxen Inclusion Complex Nanofibrous Films**

Asli Celebioglu<sup>a</sup>, Kareena Dash<sup>b</sup>, Mahmoud Aboelkheir<sup>a</sup>, Mehmet E. Kilic<sup>c</sup>, Engin Durgun<sup>d</sup> and Tamer Uyar<sup>a\*</sup>

<sup>a</sup>Fiber Science Program, Department of Human Centered Design

College of Human Ecology, Cornell University, Ithaca, NY, 14853, USA

<sup>b</sup>Biological Sciences, College of Arts and Sciences, Cornell University, Ithaca, NY, 14853, USA

<sup>c</sup>Computational Science Research Center, Korea Institute of Science and Technology, Seoul, 02792, Republic of Korea

<sup>d</sup>UNAM-National Nanotechnology Research Center and Institute of Materials Science and Nanotechnology, Bilkent University, Ankara 06800, Turkey

\*Corresponding Author: TU: [tu46@cornell.edu](mailto:tu46@cornell.edu)

## Application of release data on mathematical models:

**Zero order model:** The release of drug can be represented by the equation:

$$C_0 - C_t = K_0 t$$

$$C_t = C_0 + K_0 t$$

$C_t$  is the amount of drug released at time  $t$ ,  $C_0$  is the initial concentration of drug at time  $t=0$ ,  $K_0$  is the zero-order rate constant. Here, the slope of the cumulative drug release vs. time plot gives the correlation coefficient ( $R^2$ ) value.

**First order model:** The release of drug can be represented by the equation:

$$DC/dt = -K_1 C$$

$K_1$  is the first order rate constant, expressed in  $\text{time}^{-1}$  or per hour

After rearranging and integrating the equation,

$$\log C = \log C_0 - K_1 t / 2.303$$

$C_0$  is the initial concentration of the drug,  $C$  is the percent of drug remaining at time  $t$ . Here, the slope of the  $\log$  % of drug remaining vs. time gives the  $R^2$  value.

**Higuchi model:** Higuchi release model is represented as:

$$M_t / M_\infty = K_h t^{1/2}$$

where  $M_t / M_\infty$  is the fraction of drug released at each time point ( $t$ ),  $M_t$  is the amount of drug released in time  $t$ ,  $M_\infty$  is the amount of drug released after time  $\infty$ , and  $K_h$  represents the Higuchi release kinetic constant. Here, the plot is obtained by cumulative percentage drug release vs. square root of time and the slope gives  $R^2$  value.

**Korsmeyer-peppas model:** Korsmeyer-peppas model is represented as:

$$M_t / M_\infty = K_{kp} t^n$$

$$\log (M_t / M_\infty) = \log K_{kp} + n \log t$$

$M_t / M_\infty$  is a fraction of drug released at time  $t$ ,  $M_t$  is the amount of drug released in time  $t$ ,  $M_\infty$  is the amount of drug released after time  $\infty$ ,  $n$  is the diffusional exponent or drug release exponent,  $K_{kp}$  is the Korsmeyer release rate constant. Here, the graph is plotted between  $\log$  cumulative % drug release vs.  $\log$  time and the slope gives  $R^2$  value.

**Table S1.** The correlation coefficient ( $R^2$ ) values of samples calculated by using different kinetic models.

| <b>Kinetic model</b>                 | <b>Naproxen</b> | <b>Naproxen/HP<math>\beta</math>CD<br/>(1/1) IC NF</b> | <b>Naproxen/HP<math>\beta</math>CD<br/>(1/2) IC NF</b> |
|--------------------------------------|-----------------|--------------------------------------------------------|--------------------------------------------------------|
| Zero-order                           | 0.8322          | 0.2590                                                 | 0.2230                                                 |
| First-order                          | 0.9880          | 0.6884                                                 | 0.6233                                                 |
| Higuchi                              | 0.9732          | 0.4863                                                 | 0.4392                                                 |
| Korsmeyer-Peppas                     | 0.9791          | 0.7751                                                 | 0.7676                                                 |
| Diffusion exponent<br>( $n$ value) * | 0.6125          | 0.7398                                                 | 0.6215                                                 |

\*calculated by the linear regression of Korsmeyer-Peppas equation of  $\log(M_t/M_\infty)$  versus  $\log t$ .

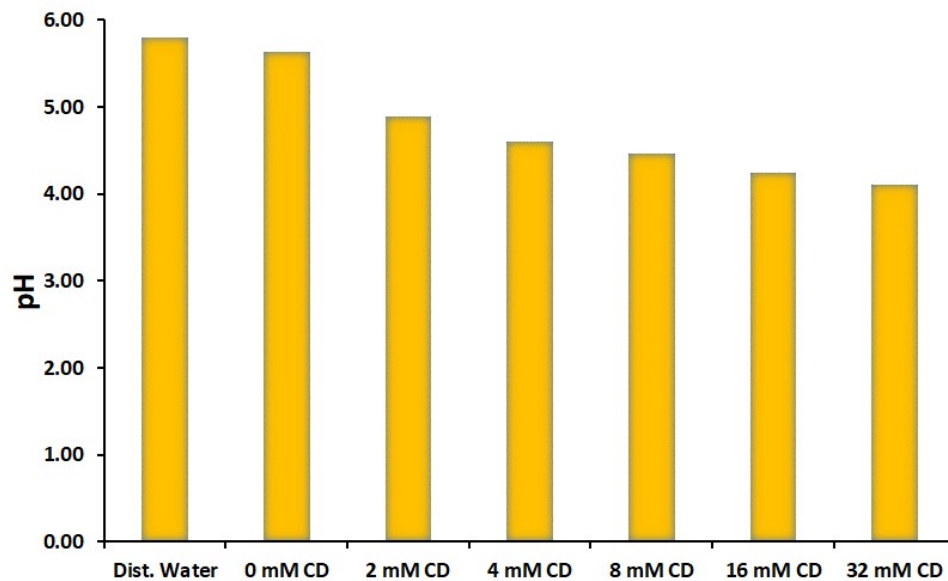

**Figure S1.** pH value diagram of solutions prepared for phase solubility test against increasing CD concentrations.
